# Supplementary material for: Indicators for Ex-Post Evaluation of Cultural Heritage Adaptive Reuse Impacts in the Perspective of the Circular Economy
Source: MDPI journal article supplement (doi:10.3390/su13094759), 2021-04-23
Supplement: s1 [file s1]

## Supplementary Materials for the article:

# Indicators for ex-post evaluation of cultural heritage adaptive reuse impacts in the perspective of the circular economy

Martina Bosone <sup>1</sup>, Pasquale De Toro <sup>2</sup>, Luigi Fusco Girard <sup>1,2</sup>, Antonia Gravagnuolo <sup>1</sup> and Silvia Iodice <sup>1,3,\*</sup>

<sup>1</sup> Institute for Research on Innovation and Services for Development, National Research Council (CNR-IRISS), Naples, 80134, Italy; m.bosone@iriss.cnr.it (M.B.); l.fuscogirard@iriss.cnr.it or girard@unina.it (L.F.G.); a.gravagnuolo@iriss.cnr.it (A.G.)

<sup>2</sup> Department of Architecture, University of Naples Federico II, Naples, 80134, Italy; pasquale.detoro@unina.it (P.D.T.)

<sup>3</sup> Joint Research Centre, European Commission, Ispra (VA), 21027, Italy; silvia.iodice@ec.europa.eu (S.I.)

\* Correspondence: s.iodice@iriss.cnr.it

**Abstract:** Cultural heritage (CH) is considered a key element of cities and regions' identity and uniqueness, contributing to peoples' wellbeing and health, as well as jobs creation, environmental regeneration and place attractiveness. The adaptive reuse of abandoned and underused CH can be a sustainable strategy for heritage conservation, stimulating local development processes. However, heritage conservation needs large investments, while the resources available are scarce, and investment projects are subject to high uncertainties. Therefore, a careful assessment of impacts is needed to orient and direct CH adaptive reuse projects towards sustainability. Recent studies approach the adaptive reuse of abandoned buildings and sites as an effective circular economy strategy, potentially contributing to climate objectives through environmental regeneration and the reduction of natural resources consumption. However, evaluation tools to assess the impacts and orient adaptive reused interventions in the perspective of circularity are lacking. Through the analysis of 76 literature sources on CH impacts, this article explores how indicators are currently used in CH research and practice as impact assessment tools. More than 3500 indicators were retrieved and classified. Finally, this article proposes a comprehensive evaluation framework to assess the impacts of cultural heritage adaptive reuse in the perspective of the circular economy. The results showed that, while some indicators are available, many circularity aspects are not considered in the current studies on CH impacts.

**Keywords:** multidimensional indicators; evaluation tools; cultural heritage; adaptive reuse; circular economy; circular city; impact assessment; built environment; sustainable development

**Citation:** Bosone, M.; De Toro, P.; Fusco Girard, L.; Gravagnuolo, A.; Iodice, S. Indicators for Ex-Post Evaluation of Cultural Heritage Adaptive Reuse Impacts in the Perspective of the Circular Economy. *Sustainability* **2021**, *13*, x. <https://doi.org/10.3390/xxxxx>

Academic Editor: Asterios Bakolas

Received: 9 February 2021

Accepted: 9 April 2021

Published: date

**Publisher's Note:** MDPI stays neutral with regard to jurisdictional claims in published maps and institutional affiliations.

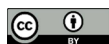

**Copyright:** © 2021 by the authors. Submitted for possible open access publication under the terms and conditions of the Creative Commons Attribution (CC BY) license (<http://creativecommons.org/licenses/by/4.0/>)

*Sustainability* **2021**, *13*, x. <https://doi.org/10.3390/xxxxx>

[www.mdpi.com/journal/sustainability](http://www.mdpi.com/journal/sustainability)

Commented [M1]: Please add city and post code

**Appendix A.** Literature sources on cultural heritage impact sectors and indicators. Ec: Economic indicators, S: Social Indicators, En: Environmental Indicators, C: Cultural Indicators.

| Source                      | Year | Source typology      | Number of indicators | Dimensions |    |    |    | Scale | Phase   | Typology |        |
|-----------------------------|------|----------------------|----------------------|------------|----|----|----|-------|---------|----------|--------|
|                             |      |                      |                      | Ec         | S  | En | C  |       |         | Quant    | Qualit |
| Nijkamp                     | 1989 | Article              | 6                    | 3          |    |    | 3  | Meso  | Ex-post | 3        | 3      |
| Pearson et al.              | 1998 | Institutional Report | 139                  | 19         | 9  | 36 | 75 | Meso  | Ex-post | 137      | 2      |
| Greffe                      | 2004 | Article              | 4                    | 4          |    |    |    | Meso  | Ex-post | 4        |        |
| Hockings et al.             | 2008 | Institutional Report | 17                   | 2          | 7  | 5  | 3  | Meso  | Ex-post | 17       |        |
| Labadi                      | 2011 | Institutional Report | 57                   | 24         | 22 | 7  | 4  | Meso  | Ex-post | 35       | 22     |
| Rypkema and Cheong          | 2011 | Article              | 29                   | 16         | 17 | 6  |    | Meso  | Ex-post | 8        | 21     |
| Licciardi and Amirtahmasebi | 2011 | Institutional Report | 13                   | 4          | 7  | 2  |    | Meso  | Ex-post | 7        | 6      |
| Zancheti and Hidaka         | 2011 | Article              | 3                    |            |    |    | 3  | Meso  | Ex-post |          | 3      |
| Elsorady                    | 2014 | Article              | 16                   | 1          | 3  | 3  | 9  | Micro | Ex-ante |          | 16     |
| CHCfE Consortium            | 2015 | Research Report      | 54                   | 18         | 13 | 9  | 14 | Meso  | Ex-post | 32       | 22     |
| Fusco Girard et al.         | 2015 | Article              | 124                  | 77         | 14 | 15 | 18 | Meso  | Ex-post | 121      | 3      |
| James                       | 2015 | Article              | 40                   | 8          | 16 | 9  | 7  | Meso  | Ex-post | 35       | 22     |
| Sowińska-Świerkosz          | 2017 | Article              | 15                   | 3          | 1  | 7  | 4  | Meso  | Ex-post | 10       | 5      |
| Guzmán et al.               | 2017 | Article              | 14                   |            | 4  | 6  | 4  | Meso  | Ex-post | 12       | 2      |
| Nocca                       | 2017 | Article              | 178                  | 111        | 35 | 1  | 31 | Meso  | Ex-post | 172      | 6      |
| Stanik et al.               | 2018 | Article              | 6                    |            |    | 2  | 4  | Macro | Ex-post | 3        | 3      |
| Vecco and Srakar            | 2018 | Article              | 7                    | 2          | 1  | 1  | 3  | Macro | Ex-post | 7        |        |
| Airaghi et al.              | 2019 | Research Report      | 13                   | 12         | 1  |    |    | Meso  | Ex-post | 13       |        |
| Historic England            | 2019 | Research Report      | 41                   | 7          | 5  | 7  | 22 | Macro | Ex-post | 41       |        |
| Günçe and Mısırlısoy        | 2019 | Article              | 25                   | 5          | 4  | 6  | 10 | Micro | Ex-post |          | 25     |
| Della Spina                 | 2020 | Article              | 11                   | 6          |    | 4  | 1  | Micro | Ex-ante | 4        | 7      |
| De Leão Dornelles et al     | 2020 | Article              | 1                    |            |    |    | 1  |       | Ex-post |          | 1      |
| Melloni et al.              | 2020 | Research Report      | 144                  | 19         | 82 | 7  | 36 | Meso  | Ex-post | 121      | 23     |

**Appendix B.** Literature sources on other impact sectors and indicators. Ec: Economic indicators, S: Social Indicators, En: Environmental Indicators, C: Cultural Indicators.

| Source                                       | Year | Source typology      | Number of indicators | Dimensions |     |    |     | Scale | Phase       | Typology |        |
|----------------------------------------------|------|----------------------|----------------------|------------|-----|----|-----|-------|-------------|----------|--------|
|                                              |      |                      |                      | Ec         | S   | En | C   |       |             | Quant    | Qualit |
| Mercer                                       | 2002 | Institutional Report | 373                  | 56         | 204 | 21 | 92  | Macro | Ex-post     | 181      | 192    |
| WTO                                          | 2004 | Institutional Report | 29                   | 6          | 7   | 16 |     | Macro | Ex-post     | 24       | 5      |
| OCPA Task Force                              |      | Institutional Report | 64                   | 15         | 21  | 2  | 26  | Macro | Monitorin g | 21       | 43     |
| Home Affairs Bureau                          | 2005 | Institutional Report | 27                   | 7          | 10  |    | 10  | Macro | Ex-post     | 12       | 15     |
| Choi and Sirakaya                            | 2006 | Article              | 98                   | 16         | 42  | 30 | 10  | Meso  | Ex-post     | 35       | 63     |
| OECD                                         | 2006 | Institutional Report | 104                  | 68         | 26  |    | 10  | Macro | Ex-post     | 103      | 1      |
| Jackson et al.                               | 2006 | Research Report      | 53                   | 16         | 9   | 1  | 27  | Macro | Ex-post     | 46       | 7      |
| UNESCO                                       | 2007 | Institutional Report | 21                   | 3          | 3   |    | 15  | Meso  | Ex-post     | 19       | 2      |
| UNESCO                                       | 2007 | Institutional Report | 23                   | 11         | 8   |    | 4   | Macro | Ex-post     | 23       |        |
| Institut de la statistique du Québec         | 2007 | Institutional Report | 67                   | 29         | 29  |    | 9   | Macro | Ex-post     | 56       | 11     |
| OECD                                         | 2008 | Institutional Report | 31                   | 20         | 3   | 1  | 7   | Macro | Ex-post     | 21       | 10     |
| Ministry for Culture and Heritage            | 2009 | Institutional Report | 17                   | 5          | 5   |    | 7   | Macro | Ex-post     | 15       | 2      |
| KEA European Affairs                         | 2009 | Institutional Report | 11                   | 3          | 5   |    | 3   | Macro | Ex-post     | 11       |        |
| NCCRS                                        | 2010 | Institutional Report | 16                   | 6          | 4   |    | 6   | Macro | Ex-post     | 16       |        |
| UNESCO                                       | 2010 | Institutional Report | 312                  | 83         | 99  | 15 | 115 | Macro | Ex-post     | 177      | 135    |
| Ngamsomsuke et al.                           | 2011 | Article              | 20                   | 4          | 3   | 7  | 6   | Macro | Ex-post     |          | 20     |
| Daschko                                      | 2011 | Institutional Report | 47                   | 5          | 28  | 2  | 12  | Macro | Ex-post     | 7        | 40     |
| Ministry of Culture and Education of Finland | 2011 | Institutional Report | 116                  | 54         | 33  | 3  | 26  | Macro | Ex-post     | 105      | 11     |
| ESS-net-CULTUR                               | 2012 | Research Report      | 28                   | 9          | 11  |    | 8   | Macro | Ex-post     | 28       |        |
| Lozano Oyola et al.                          | 2012 | Article              | 62                   | 20         | 6   | 28 | 8   | Meso  | Ex-post     | 54       | 8      |
| Montalto                                     | 2012 | Institutional Report | 23                   | 13         | 5   | 1  | 4   | Meso  | Ex-post     | 16       | 7      |

|                                                  |      |                      |     |    |    |    |    |       |         |    |    |
|--------------------------------------------------|------|----------------------|-----|----|----|----|----|-------|---------|----|----|
| UNESCO and UNDP                                  | 2013 | Research Report      | 54  | 23 | 18 | 2  | 11 | Macro | Ex-post | 44 | 10 |
| Columbia Basin Rural Development Institute       | 2013 | Research Report      | 164 | 48 | 36 | 6  | 74 | Macro | Ex-post | 94 | 70 |
| Oxford Economics                                 | 2013 | Research Report      | 4   | 4  |    |    |    | Macro | Ex-post | 4  |    |
| UCLG                                             | 2014 | Institutional Report | 57  |    | 34 | 5  | 18 | Meso  | Ex-post |    | 57 |
| ARTS COUNCIL ENGLAND                             | 2014 | Institutional Report | 59  |    | 51 |    | 8  | Micro | Ex-post |    | 59 |
| UNESCO                                           | 2014 | Institutional Report | 22  | 2  | 13 |    | 7  | Macro | Ex-post | 16 | 6  |
| United Nations                                   | 2015 | Institutional Report | 53  | 12 | 27 | 8  | 6  | Macro | Ex-post | 53 |    |
| Global network “Future we want includes culture” | 2015 | Institutional Report | 28  | 2  | 8  | 5  | 13 | Macro | Ex-post | 26 | 2  |
| Kushner and Cohen                                | 2016 | Research Report      | 17  | 15 | 2  |    |    | Macro | Ex-post | 28 |    |
| Council of Europe                                | 2016 | Institutional Report | 26  | 5  | 14 |    | 7  | Macro | Ex-post | 16 | 10 |
| University of Baltimore                          | 2016 | Institutional Report | 56  | 6  | 27 | 18 | 5  | Meso  | Ex-post | 53 | 3  |
| Blancas et al.                                   | 2016 | Article              | 52  | 26 | 11 | 12 | 3  | Macro | Ex-post | 52 |    |
| European Commission                              | 2016 | Research Report      | 43  | 14 | 10 | 18 | 1  | Meso  | Ex-post | 41 | 2  |
| UNESCO                                           | 2017 | Institutional Report | 60  | 6  | 20 | 13 | 21 | Macro | Ex-post | 36 | 24 |
| Ortega-Villa and Ley-Garcia                      | 2017 | Article              | 19  |    | 12 |    | 7  | Meso  | Ex-post | 4  | 15 |
| Rei and Huan                                     | 2018 | Article              | 67  | 14 | 18 | 24 | 11 | Micro | Ex-post | 41 | 26 |
| ISTAT                                            | 2018 | Research Report      | 2   | 2  |    |    |    | Macro | Ex-post | 2  |    |
| EUROSTAT                                         | 2019 | Research Report      | 14  | 3  | 2  |    | 9  | Macro | Ex-post | 12 | 2  |
| EUROSTAT                                         | 2019 | Research Report      | 9   | 1  | 4  | 4  |    | Macro | Ex-post | 9  |    |
| UNESCO                                           | 2019 | Research Report      | 21  | 7  | 6  | 1  | 7  | Macro | Ex-post | 1  | 8  |
| Montalto et al.                                  | 2019 | Article              | 12  | 4  | 4  |    | 4  | Meso  | Ex-post | 7  | 5  |
| ISTAT                                            | 2018 | Research Report      | 11  | 2  | 3  | 6  |    | Macro | Ex-post | 9  | 2  |
| Asmelash and Kumar                               | 2019 | Article              | 61  | 10 | 31 | 12 | 8  | Macro | Ex-post | 14 | 47 |
| European Commission                              | 2019 | Website              | 16  | 8  | 2  | 6  |    | Macro | Ex-post | 14 | 2  |

|                                          |      |                      |    |   |    |   |       |            |    |   |
|------------------------------------------|------|----------------------|----|---|----|---|-------|------------|----|---|
| European Commission                      | 2019 | Institutional Report | 29 | 3 | 21 | 5 | Meso  | Ex-post    | 23 | 6 |
| OECD and ICOM                            | 2019 | Institutional Report | 8  | 2 | 6  |   | Macro | Monitoring | 2  | 6 |
| Compendium of Cultural Policies & Trends | 2019 | Website              | 26 | 8 | 11 | 7 | Macro | Ex-post    | 18 | 8 |

**Appendix C.** Literature sources on Circular Economy impact sectors and indicators. Ec: Economic indicators, S: Social Indicators, En: Environmental Indicators, C: Cultural Indicators.

| Source                         | Year | Source typology | Number of indicators | Dimensions |   |    |   | Scale | Phase   | Typology |        |
|--------------------------------|------|-----------------|----------------------|------------|---|----|---|-------|---------|----------|--------|
|                                |      |                 |                      | Ec         | S | En | C |       |         | Quant    | Qualit |
| Gravagnuolo et al. [36]        | 2019 | Article         | 17                   |            |   | 17 |   | Meso  | Ex-post | 17       |        |
| Historic England [141]         | 2019 | Research Report | 2                    |            |   | 2  |   | Micro | Ex-post | 2        |        |
| Foster and Kreinin [43]        | 2020 | Article         | 12                   |            |   | 12 |   | Micro | Ex-post | 12       |        |
| Foster et al. [44]             | 2020 | Article         | 20                   |            |   | 20 |   | Micro | Ex-post | 20       |        |
| Heisel and Rau-Oberhuber [142] | 2020 | Article         | 3                    |            |   | 3  |   | Micro | Ex-post | 3        |        |
